# Supplementary material for: Hippocampus and serum metabolomic studies to explore the regulation of Chaihu-Shu-Gan-San on metabolic network disturbances of rats exposed to chronic variable stress
Source: Royal Society of Chemistry journal article supplement (doi:10.1039/c3mb70377k), 2013-11-21
Supplement: c3mb70377k.pdf [file c3mb70377k.pdf]

1 **Supplementary material**

2 **Table S1.** The metabolic pathways matched according to p values from pathway  
 3 enrichment analysis and pathway impact values from pathway topology analysis on  
 4 MetaboAnalyst 2.0 (<http://www.metaboanalyst.ca/MetaboAnalyst/>)

| Pathway Name                                        | Total | Expected | p        | -log(p) | Impact  | Details |
|-----------------------------------------------------|-------|----------|----------|---------|---------|---------|
| Arginine and proline metabolism                     | 44    | 0.65906  | 0.025849 | 3.6555  | 0.07598 | KEGG    |
| Phenylalanine, tyrosine and tryptophan biosynthesis | 4     | 0.059914 | 0.058643 | 2.8363  | 0.5     | KEGG    |
| Aminoacyl-tRNA biosynthesis                         | 67    | 1.0036   | 0.07494  | 2.5911  | 0.0     | KEGG    |
| Tryptophan metabolism                               | 41    | 0.61412  | 0.12356  | 2.091   | 0.15684 | KEGG    |
| Ascorbate and aldarate metabolism                   | 9     | 0.13481  | 0.12735  | 2.0608  | 0.0     | KEGG    |
| Phenylalanine metabolism                            | 9     | 0.13481  | 0.12735  | 2.0608  | 0.40741 | KEGG    |
| Primary bile acid biosynthesis                      | 46    | 0.68902  | 0.14922  | 1.9023  | 0.02976 | KEGG    |
| Nicotinate and nicotinamide metabolism              | 13    | 0.19472  | 0.17885  | 1.7212  | 0.2381  | KEGG    |
| Pentose and glucuronate interconversions            | 14    | 0.2097   | 0.19126  | 1.6541  | 0.27273 | KEGG    |
| Pantothenate and CoA biosynthesis                   | 15    | 0.22468  | 0.2035   | 1.5921  | 0.02041 | KEGG    |
| beta-Alanine metabolism                             | 19    | 0.28459  | 0.2507   | 1.3835  | 0.0     | KEGG    |
| Purine metabolism                                   | 68    | 1.0185   | 0.27107  | 1.3054  | 0.01324 | KEGG    |
| Sphingolipid metabolism                             | 21    | 0.31455  | 0.27329  | 1.2972  | 0.0     | KEGG    |
| Starch and sucrose metabolism                       | 23    | 0.34451  | 0.29523  | 1.22    | 0.03778 | KEGG    |
| Alanine, aspartate and glutamate                    | 24    | 0.35949  | 0.30597  | 1.1843  | 0.0     | KEGG    |

|                                          |    |         |         |         |         |      |
|------------------------------------------|----|---------|---------|---------|---------|------|
| metabolism                               |    |         |         |         |         |      |
| Glutathione metabolism                   | 26 | 0.38944 | 0.32697 | 1.1179  | 0.0     | KEGG |
| Glycerophospholipid metabolism           | 30 | 0.44936 | 0.36716 | 1.0019  | 0.04444 | KEGG |
| Glycine, serine and threonine metabolism | 32 | 0.47932 | 0.38639 | 0.9509  | 0.0     | KEGG |
| Fatty acid biosynthesis                  | 43 | 0.64408 | 0.48261 | 0.72855 | 0.0     | KEGG |

5

6 **Figure S1.** Overview of pathway analysis according to p values from pathway  
 7 enrichment analysis and pathway impact values from pathway topology analysis on  
 8 MetaboAnalyst 2.0 (<http://www.metaboanalyst.ca/MetaboAnalyst/>).

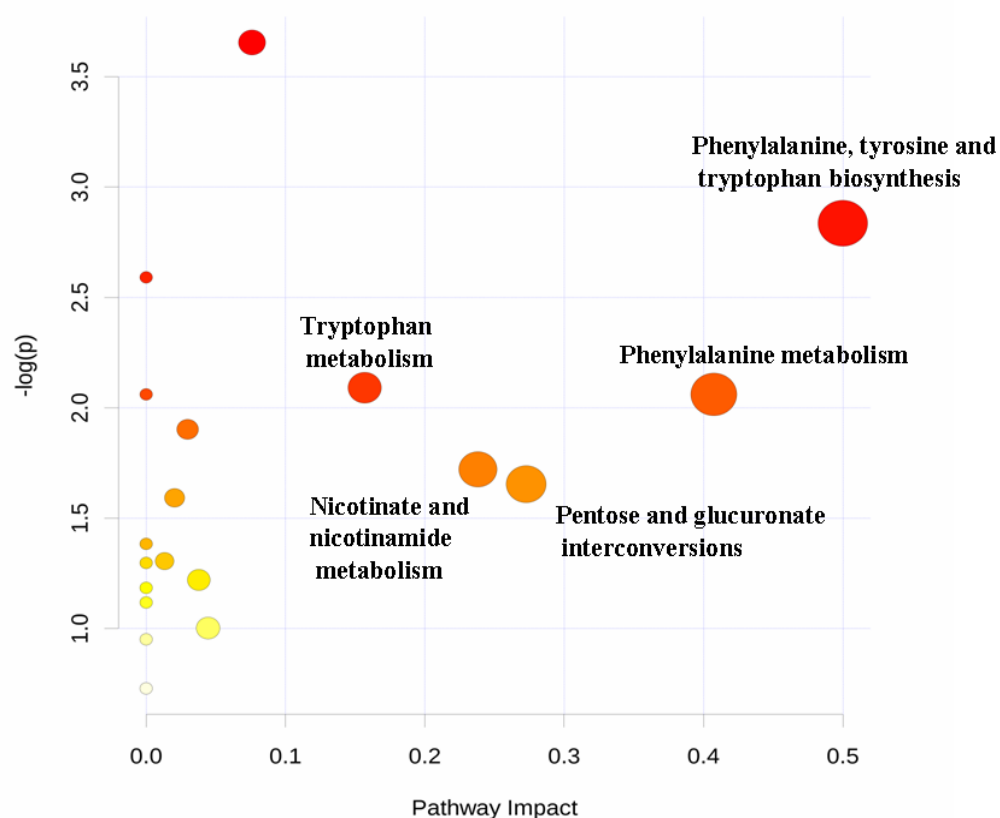

9

10

11

12
